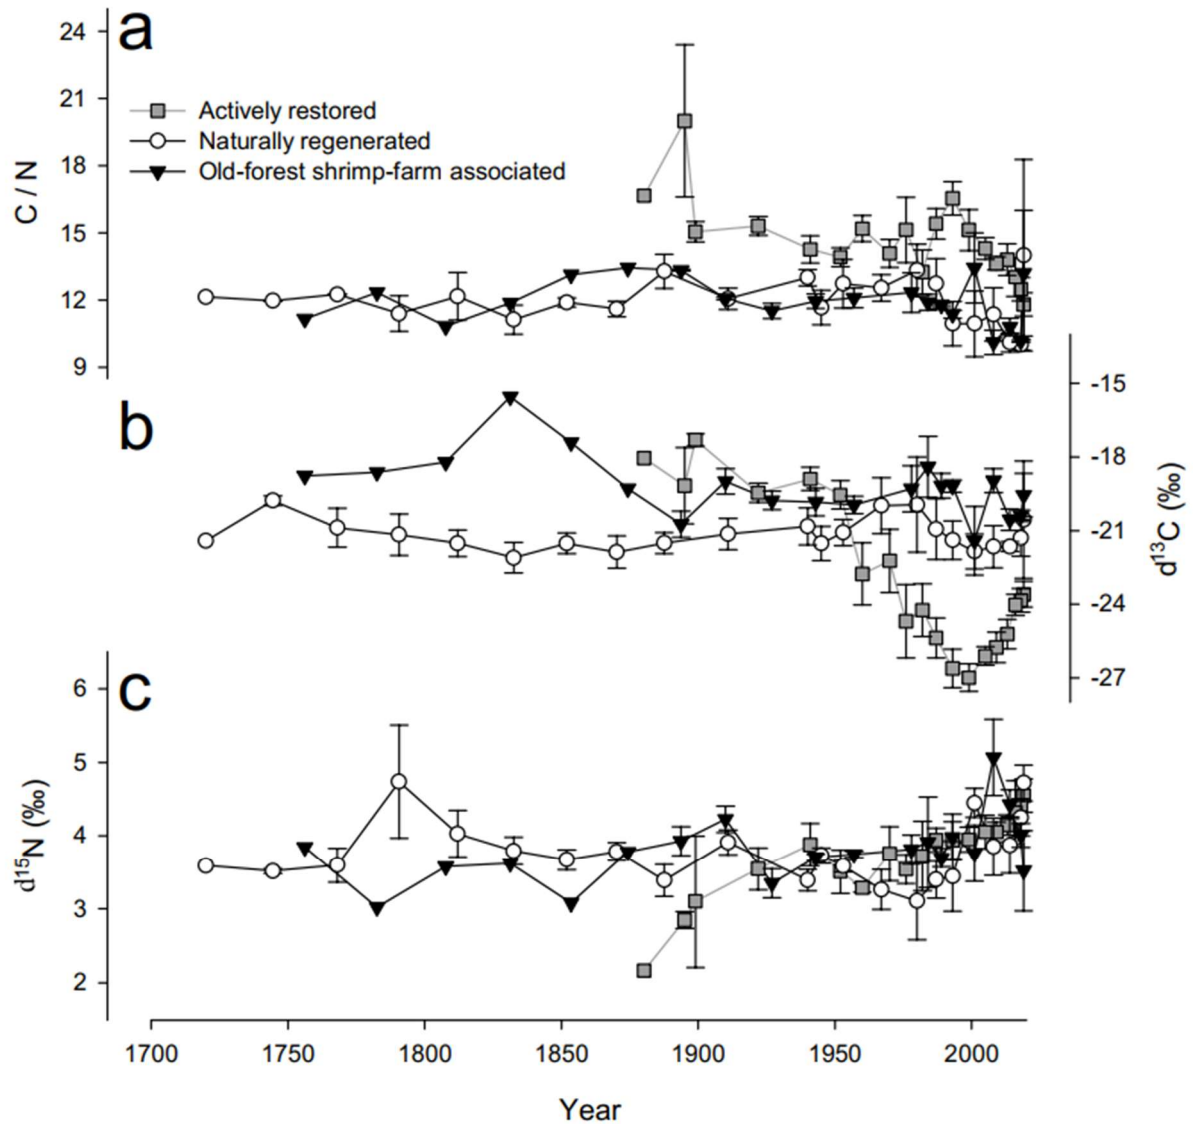

**Figure S4.** Source of sedimentary organic carbon. Time series of (a) C/N ratio, (b)  $\delta^{13}\text{C}$  (‰) and (c)  $\delta^{15}\text{N}$  (‰) of sedimentary organic material from each core horizon from restored, regenerated and shrimp farm-associated old-forest mangrove types ( $n = 3$  cores per site), and contemporary end-members (isotopic values from the literature and this study - see Table S1). Pre-1900 dating extrapolated from the post-1900  $^{210}\text{Pb}$  chronologies. POM = particulate organic matter. Data presented as mean  $\pm$  SE.
