**Table S1.** Contemporary material  $\delta^{13}\text{C}$  /  $\delta^{15}\text{N}$  isotope signatures used as end-member carbon sources in the simmr Stable Isotope Mixing Model. Data presented as mean $\pm$ SD.

| End-member            | $\delta^{13}\text{C}$ | $\delta^{15}\text{N}$ | N   | Data source     |
|-----------------------|-----------------------|-----------------------|-----|-----------------|
| Mangrove roots        | -28.6 $\pm$ 1.1       | 3.6 $\pm$ 1.7         | 16  | This study      |
| Mangrove litter       | -28.1 $\pm$ 1.4       | 1.5 $\pm$ 0.9         | 26  | [1]             |
| Coastal Phytoplankton | -21.2 $\pm$ 0.4       | 3.7 $\pm$ 0.3         | 3   | [1]             |
| POM (inland)          | -25.0 $\pm$ 2.7       | 0.6 $\pm$ 0.8         | 7   | [1]             |
| Benthic Microalgae    | -20.2 $\pm$ 2.3       | 0.6 $\pm$ 0.6         | 5   | [2]             |
| Polychaetes           | -26.0 $\pm$ 0.7       | 10.3 $\pm$ 1.5        | 5   | [2]             |
| Gastropods            | -20.4 $\pm$ 2.2       | 7.2 $\pm$ 2.8         | 51  | [2]             |
| Bivalves              | -22.3 $\pm$ 1.4       | 8.0 $\pm$ 1.4         | 24  | [2]             |
| Crabs                 | -18.9 $\pm$ 2.2       | 8.8 $\pm$ 2.2         | 79  | [2]             |
| Prawns                | -19.0 $\pm$ 1.1       | 10.9 $\pm$ 0.5        | 22  | [2]             |
| Fish                  | -19.5 $\pm$ 1.7       | 11.9 $\pm$ 1.2        | 190 | This study; [3] |
| Macroalgae            | -16.0 $\pm$ 1.3       | 6.7 $\pm$ 4.0         | 10  | [4, 5]          |

### Table S1 References

1. Nguyen TT, Tran DQ, Hamaoka H, Nuhan MT, Omori K. Sources and exchange of particulate organic matter in an estuarine mangrove ecosystem of Xuan Thuy National Park, Vietnam. *Estuaries and Coasts*. 2012;35:1060-8.
2. Nguyen TT, Hamaoka H, Sogabe A, Tran DQ, Mai TN, Omori K. Food sources of macro-invertebrates in an important mangrove ecosystem of Vietnam determined by dual stable isotope signatures. *Journal of sea research*. 2012;72:14-21.
3. Nguyen TT, Hamaoka H, Tran DQ, Mai TN, Sogabe A, Nguyen TN, et al. Dual isotope study of food sources of a fish assemblage in the Red River mangrove ecosystem, Vietnam. *Hydrobiologia*. 2014;733:71-83.
4. Kwan KY, Bopp J, Huang S, Chen Q, Wang CC, Wang X, et al. Ontogenetic resource use and trophic dynamics of endangered juvenile *Tachypleus tridentatus* among diversified nursery habitats in the northern Beibu Gulf, China. *Integrative Zoology*. 2021;16(6):908-28.
5. Luu VD, Nguyen TT, Pham VL, Tran DQ, Vo MC, Nguyen DT, et al. Stable Isotopes ( $\delta^{13}\text{C}$  and  $\delta^{15}\text{N}$ ) and Trace Elements of Invertebrates and Fish from the Coastal Waters of Ha Tinh Province, Central Vietnam. *Archives of Environmental Contamination and Toxicology*. 2023;85(3):229-44.
